# Supplementary material for: Facile and large scale in situ synthesis of the thermal responsive fluorescent SiNPs/PNIPAM hydrogels
Source: Royal Society of Chemistry journal article supplement (doi:10.1039/c6ra09534h), 2016-01-01
Supplement: c6ra09534h1.pdf [file c6ra09534h1.pdf]

## Supporting Information

### Facile and large scale in-situ synthesis of the thermal responsive fluorescent SiNPs/PNIPAM hydrogels

Xiao-Yan Zhang, Yan Zheng, Chun-Hua Liu,\* Ping-Hua Wang, and Yuan-Yuan Zhu\*

*School of Chemistry and Chemical Engineering, Hefei University of Technology and Anhui Key  
Laboratory of Advanced Functional Materials and Devices, Hefei 230009, China*

*lchh88@hfut.edu.cn; yyzhu@hfut.edu.cn*

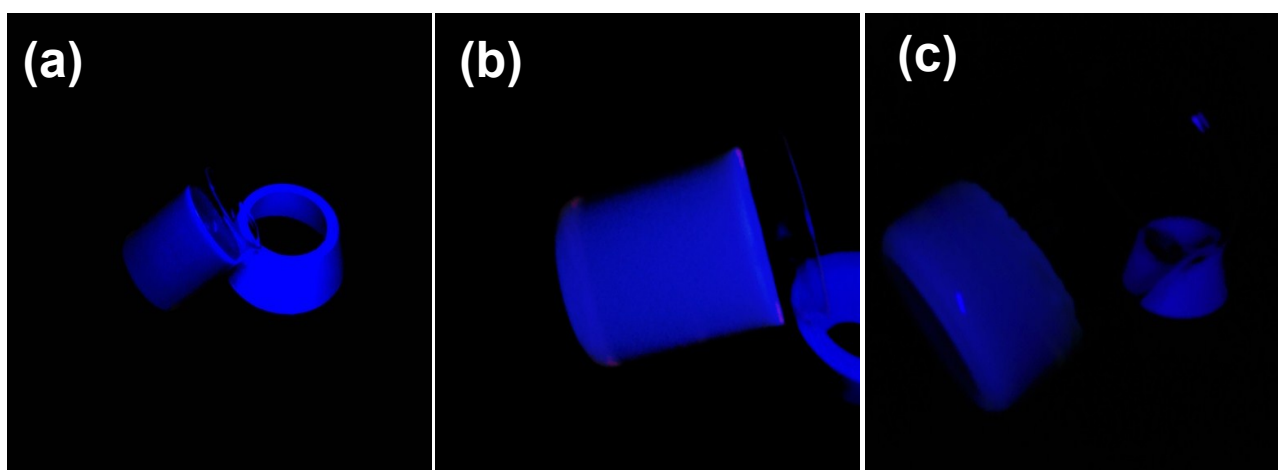

**Figure S1.** The F-SiNPs/PNIPAM hydrogels prepared by scale-up polymerization, (a) 10 multiples, (b) 50 multiples, and (c) 100 multiples.

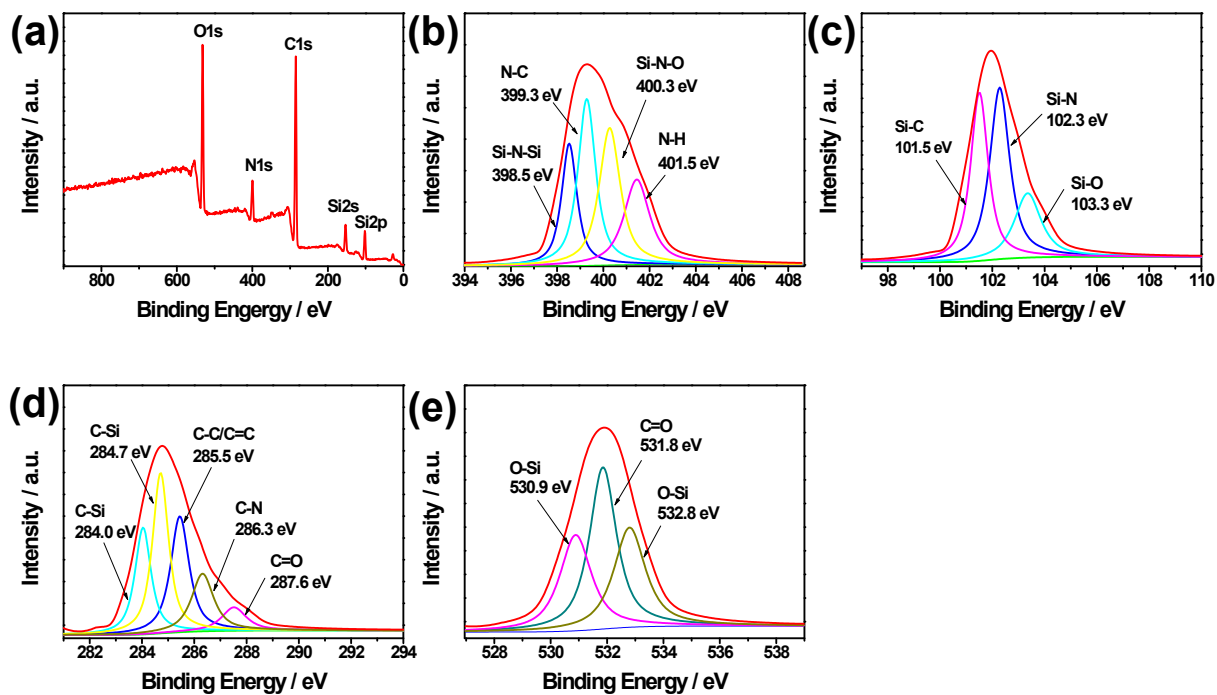

**Figure S2.** The XPS spectra of F-SiNPs (a) full scan, (b) N1s scan, (c) Si2p scan, (d) C1s scan, and (e) O1s scan.

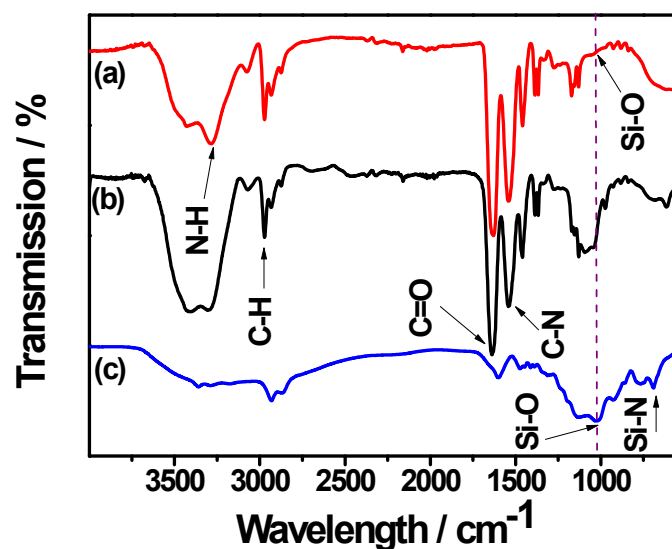

**Figure S3.** The FT-IR spectra of (a) F-SiNPs/PNIPAM, (b) PNIPAM, and (c) F-SiNPs.

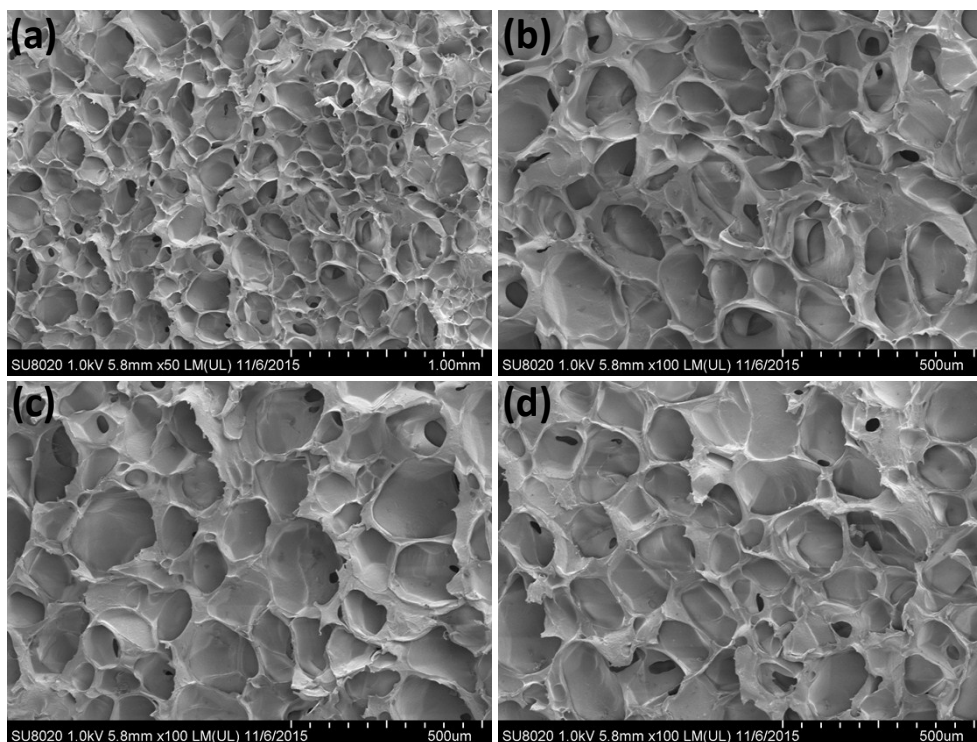

**Figure S4.** The SEM images show that the freeze-dried F-SiNPs/PNIPAM hydrogels.

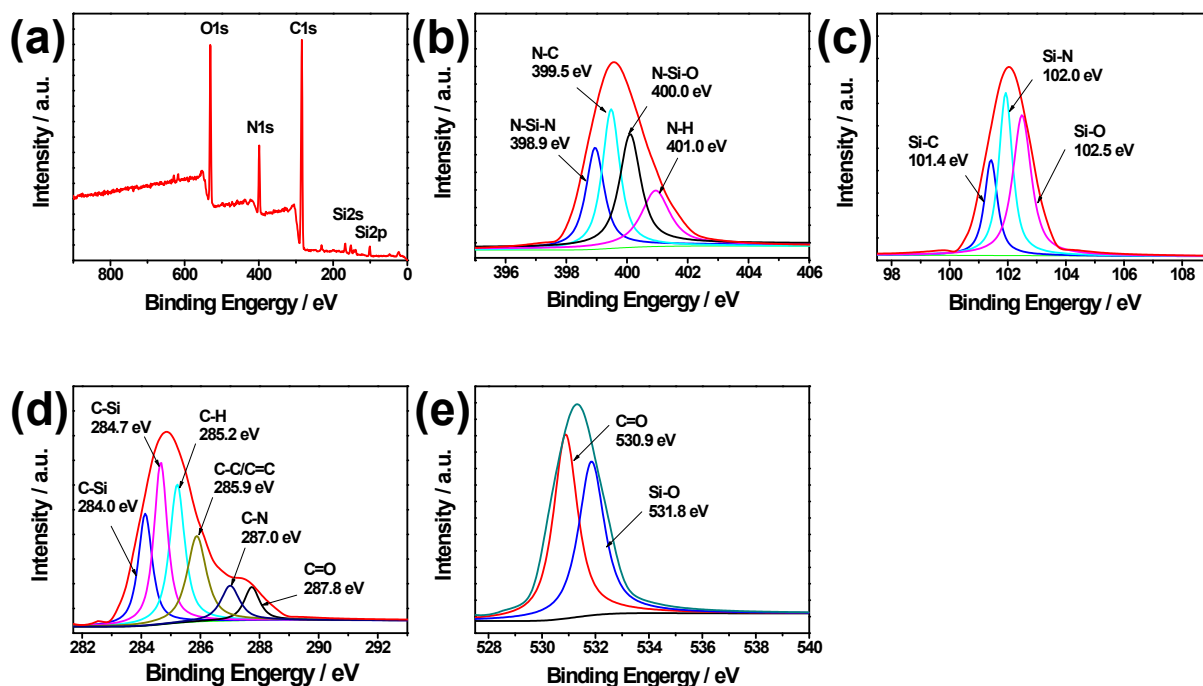

**Figure S5.** The XPS spectra of F-SiNPs/PNIPAM composite hydrogels, (a) full scan, (b) N1s scan, (c) Si2p scan, (d) C1s scan, and (e) O1s scan.

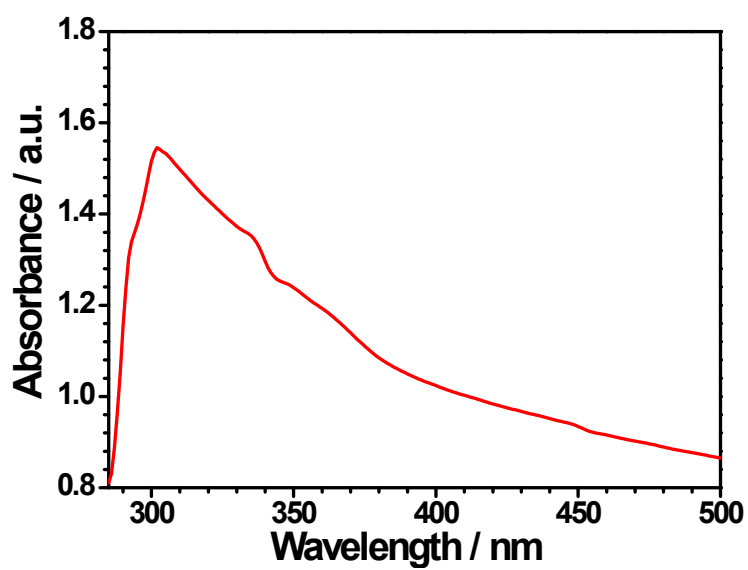

**Figure S6.** The UV-vis spectrum of F-SiNPs/PNIPAM composite hydrogels.

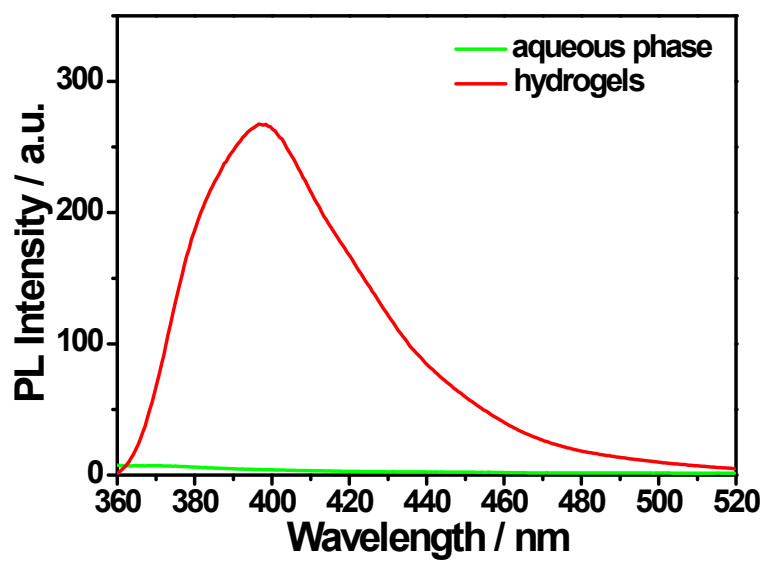

**Figure S7.** The PL spectra of swelled F-SiNPs/PNIPAM hydrogels and the aqueous phase.
